# Supplementary material
Source: publisher figshare collection journal article supplement (https://sage.figshare.com/ndownloader/files/22827119)
Supplement: Supplementary file 1 [file 22827119]

## Supplemental Material

**Table 1**

*Parallel Process Latent Growth Model*

| <b>Slope of Alcohol Related Problems</b>     | <i>b</i> | <i>s.e.</i> | <i>p</i> |
|----------------------------------------------|----------|-------------|----------|
| Slope of Racial Discrimination               | .11      | .05         | .04      |
| Intercept of Racial Discrimination           | .02      | .01         | .18      |
| Female                                       | .004     | .01         | .71      |
| Educational Attainment                       | .02      | .01         | .02      |
| General Stress                               | -.02     | .01         | .14      |
| Psychological Distress                       | .01      | .003        | .03      |
| <b>Intercept of Alcohol Related Problems</b> | <i>b</i> | <i>s.e.</i> | <i>p</i> |
| Intercept of Racial Discrimination           | .08      | .03         | .03      |
| Female                                       | -.11     | .03         | < .01    |
| Educational Attainment                       | -.06     | .02         | < .01    |
| General Stress                               | .08      | .03         | < .01    |
| Psychological Distress                       | -.01     | .01         | .26      |
| <b>Slope of Racial Discrimination</b>        | <i>b</i> | <i>s.e.</i> | <i>p</i> |
| Female                                       | -.06     | .03         | .08      |
| Educational Attainment                       | -.02     | .02         | .26      |
| General Stress                               | -.01     | .03         | .81      |
| Psychological Distress                       | -.02     | .01         | < .01    |
| <b>Intercept of Racial Discrimination</b>    | <i>b</i> | <i>s.e.</i> | <i>p</i> |
| Female                                       | -.20     | .07         | < .01    |
| Educational Attainment                       | .11      | .05         | .02      |
| General Stress                               | .12      | .07         | .07      |
| Psychological Distress                       | .10      | .02         | < .01    |

**Table 2**  
*Repeated Measures LPA for Private and Public Regard*

| <b>Private Regard</b> |         |         |         |         |             |       |       |
|-----------------------|---------|---------|---------|---------|-------------|-------|-------|
| <i>k</i> -classes     | AIC     | BIC     | aBIC    | entropy | Small Class | LRT   | B-LRT |
| 1                     | 5376.08 | 5411.15 | 5385.75 | --      | --          | --    | --    |
| 2                     | 4154.05 | 4228.57 | 4174.60 | .94     | 142 (24%)   | < .01 | < .01 |
| 3                     | 4024.03 | 4137.99 | 4055.46 | .94     | 12 (2%)     | .15   | < .01 |
| <b>Public Regard</b>  |         |         |         |         |             |       |       |
| <i>k</i> -classes     | AIC     | BIC     | aBIC    | entropy | Small Class | LRT   | B-LRT |
| 1                     | 5592.28 | 5627.37 | 5601.97 | --      | --          | --    | --    |
| 2                     | 5274.79 | 5349.37 | 5295.40 | .69     | 152 (26%)   | < .01 | < .01 |
| 3                     | 5166.81 | 5280.87 | 5198.33 | .61     | 90 (15%)    | .31   | .01   |
